# Supplementary material for: Prognostic impact of preoperative respiratory colonization on early-onset pneumonia after lung transplantation
Source: PubMed Central journal article supplement — J Thorac Dis. 2022 Jun;14(6):1900–8. doi: 10.21037/jtd-21-1724 (PMC9264098; doi:10.21037/jtd-21-1724), 2022-06
Supplement: jtd-14-06-1900-supplementary.pdf [file jtd-14-06-1900-supplementary.pdf]

**Table S1** Type of microbial preoperative colonization of donor and recipient before and after surgery

| Type of microbial—recipient/<br>preoperative colonisation | N  | Type of microbial—donor/preoperative<br>colonisation | N | Type of microbial—post transplantation/<br>preoperative colonisation | N  |
|-----------------------------------------------------------|----|------------------------------------------------------|---|----------------------------------------------------------------------|----|
| <i>Candida albicans</i>                                   | 8  | <i>Streptococcus pneumoniae</i>                      | 1 | MSSA                                                                 | 2  |
| <i>Candida speace</i>                                     | 8  |                                                      |   | MRSA                                                                 | 13 |
| CSAB                                                      | 6  | MSSA                                                 | 8 | CSAB                                                                 | 8  |
| CRAB                                                      | 13 |                                                      |   | CRAB                                                                 | 29 |
| CSPA                                                      | 3  | MRSA                                                 | 2 | MSPA                                                                 | 15 |
| CRPA                                                      | 3  |                                                      |   | MRPA                                                                 | 6  |
| MSSA                                                      | 2  | <i>Kelbsiella oxytoca</i>                            | 2 | Maltophilia                                                          | 15 |
| MRSA                                                      | 2  |                                                      |   |                                                                      |    |
| K.pn. ESBL-                                               | 4  | <i>Klebsiella pneumoniae</i> ESBL-                   | 8 | <i>Candida albicans</i>                                              | 10 |
| K.pn. ESBL+                                               | 3  |                                                      |   | <i>Candida speace</i>                                                | 20 |
| NTM                                                       | 2  | <i>Enterobacter aerogenes</i>                        | 5 | K.pn. ESBL-                                                          | 6  |
|                                                           |    |                                                      |   | K.pn. ESBL+                                                          | 18 |
| Aspergillosis                                             | 1  | <i>Candida albicans</i>                              | 4 | <i>E. coli</i> ESBL-                                                 | 1  |
|                                                           |    |                                                      |   | <i>E. coli</i> ESBL+                                                 | 6  |
| Others                                                    | 21 | A-hemolytic strepococcus                             | 2 | Others                                                               |    |
| <i>E.faecalis</i>                                         | 1  | CRAB                                                 | 2 | <i>Entrococcus faecium</i>                                           | 3  |
| Serratia                                                  | 2  | <i>Corynebacterium accolens</i>                      | 1 | Burkholderia                                                         | 7  |
| Chryseo                                                   | 3  |                                                      |   | Elizabethkingia                                                      | 5  |
| Maltophilia                                               | 6  |                                                      |   | Chryseobacterium spp.                                                | 6  |
| Burkholderia                                              | 4  |                                                      |   | NTM                                                                  | 3  |
| Streptococcus pn.                                         | 2  |                                                      |   | MRCNS                                                                | 2  |
| Elizabethkingia                                           | 2  |                                                      |   | <i>Aspergillus fumigatus</i>                                         | 1  |
| Bachromobacter<br>Sylosoxildans                           | 1  |                                                      |   | <i>E. aerogenes</i>                                                  | 1  |
|                                                           |    |                                                      |   | <i>Achromobacter denitrificans</i>                                   | 1  |
|                                                           |    |                                                      |   | <i>Serratia marcescens</i>                                           | 1  |
|                                                           |    |                                                      |   | <i>Streptococcus mitis/oralis</i>                                    | 1  |
|                                                           |    |                                                      |   | <i>Enterobacter aerogenes</i>                                        | 1  |

CSAB, carbapenem-susceptible *Acinetobacter baumannii*; CRAB, carbapenem-resistant *Acinetobacter baumannii*; CSPA, carbapenem-susceptible *pseudomonas aeruginosa*; CRPA, carbapenem-resistant *pseudomonas aeruginosa*; MSSA, methicillin-susceptible *Staphylococcus aureus*; MSRA, methicillin-resistant *Staphylococcus aureus*; K.pn. ESBL, *Klebsiella Pneumoniae* extended spectrum beta-lactamase; NTM, nontuberculous mycobacteria; E. faecalis, *Enterococcus faecalis*; E. coli, *Escherichia coli*; MRCNS, methicillin-resistant coagulase-negative *Staphylococci*; E. aerogenes, *Enterobacter aerogenes*.
